# Supplementary material for: Role of hydrogen in the chemical vapor deposition growth of MoS2atomic layers
Source: Royal Society of Chemistry journal article supplement (doi:10.1039/c5nr00904a), 2015-01-01
Supplement: c5nr00904a1.pdf [file c5nr00904a1.pdf]

## Electronic Supplementary Information

### Role of hydrogen in chemical vapor deposition growth of MoS<sub>2</sub> atomic layers

Xiao Li<sup>1,2</sup>, Xinming Li<sup>3</sup>, Xiaobei Zang<sup>1</sup>, Miao Zhu<sup>1,2</sup>, Yijia He<sup>1,2</sup>, Kunlin Wang<sup>1</sup>, Dan Xie<sup>4</sup>, Hongwei Zhu<sup>1,2\*</sup>

<sup>1</sup>School of Materials Science and Engineering, State Key Laboratory of New Ceramics and Fine Processing, Tsinghua University, Beijing 100084, China

<sup>2</sup>Center for Nano and Micro Mechanics, Tsinghua University, Beijing 100084, China

<sup>3</sup>National Center for Nanoscience and Technology, Zhongguancun, Beijing 100190, China

<sup>4</sup>Tsinghua National Laboratory for Information Science and Technology (TNList), Institute of Microelectronics, Tsinghua University, Beijing 100084, China

\*Email: hongweizhu@tsinghua.edu.cn

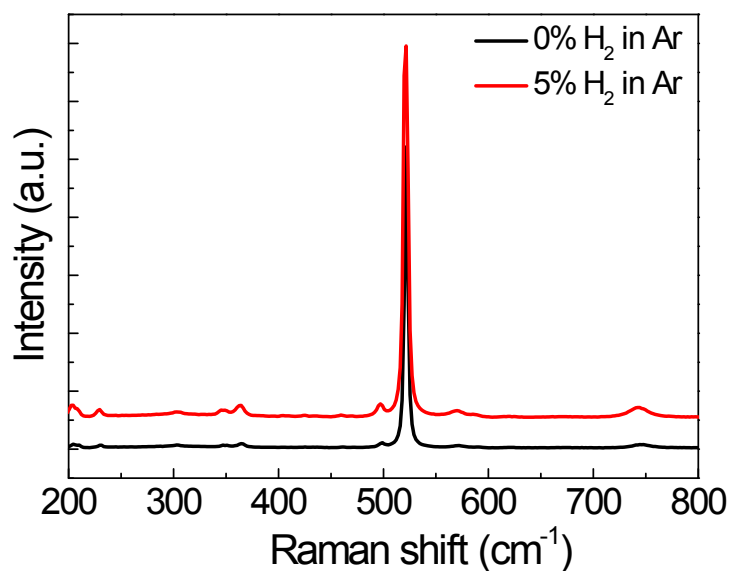

**Figure S1.** Raman spectra of the samples obtained with 0% and 5% H<sub>2</sub> after first-step annealing. No typical peaks (E<sub>12g</sub> and A<sub>1g</sub>) are observed when H<sub>2</sub> content is below 5%.

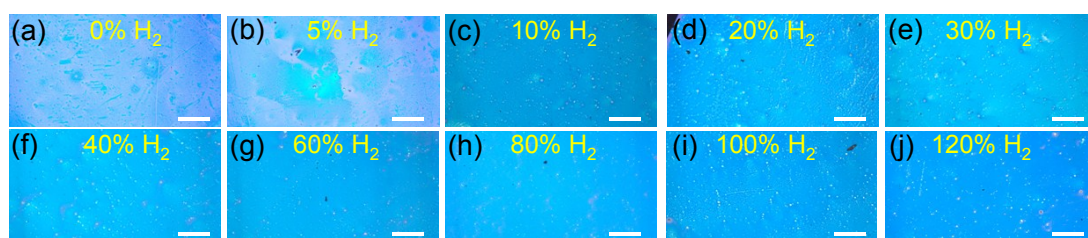

**Figure S2.** Low magnification optical microscopy images of samples obtained with different H<sub>2</sub> concentrations (in Ar) after first-step annealing. (a) 0%. (b) 5%. (c) 10%. (d) 20%. (e) 30%. (f) 40%. (g) 60%. (h) 80%. (i) 100%. (j) 120%. Scale bars: 100  $\mu$ m.

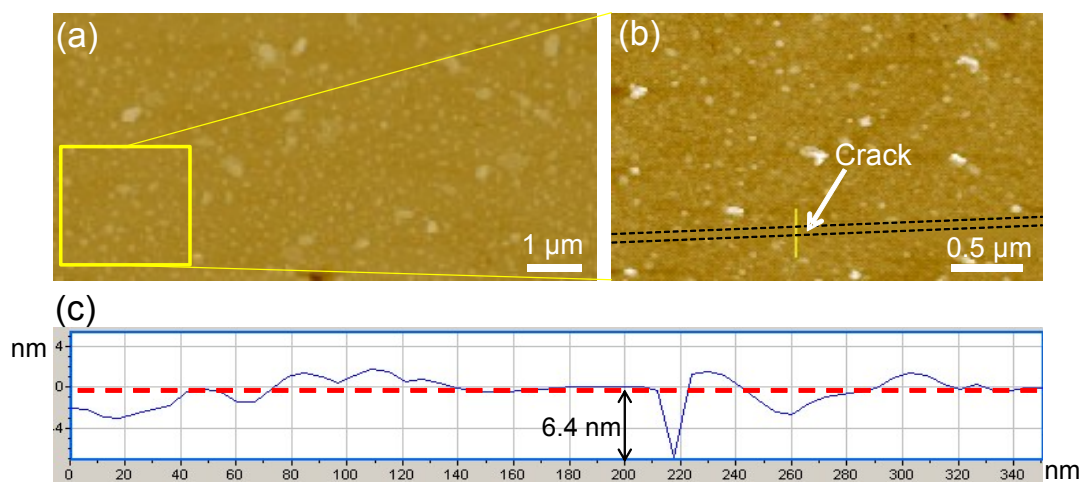

**Figure S3.** (a) AFM image of a typical sample obtained with 20% H<sub>2</sub> after sulfurization annealing. (b) Enlarged view of the marked area in (a). (c) Corresponding height profile of the yellow line marked in (b).

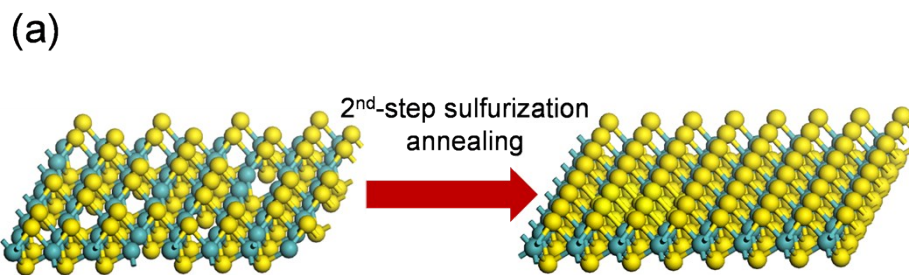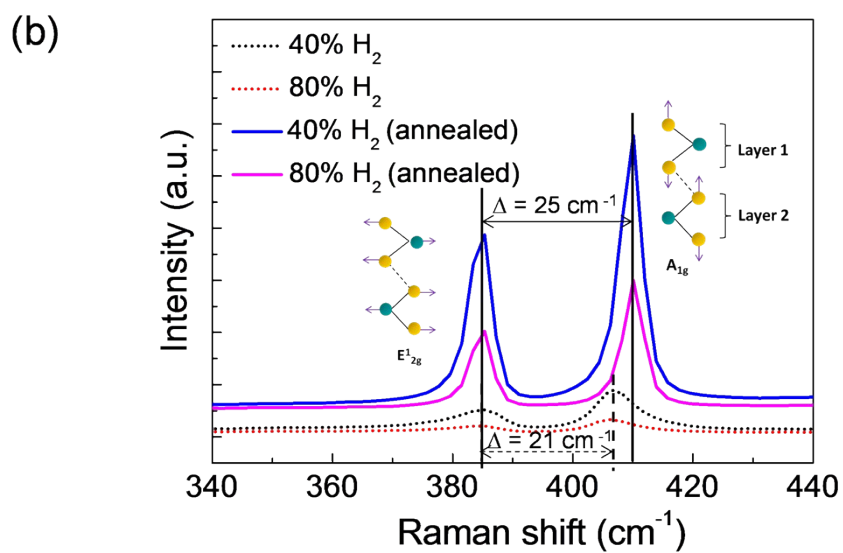

**Figure S4.** (a) Schematics of the film before and after sulfurization annealing. (b) Raman spectra of the samples obtained with 40% and 80%  $\text{H}_2$  before and after sulfurization annealing. Insets show schematic illustrations of two typical Raman-active phonon modes ( $E_{12g}$ ,  $A_{1g}$ ).

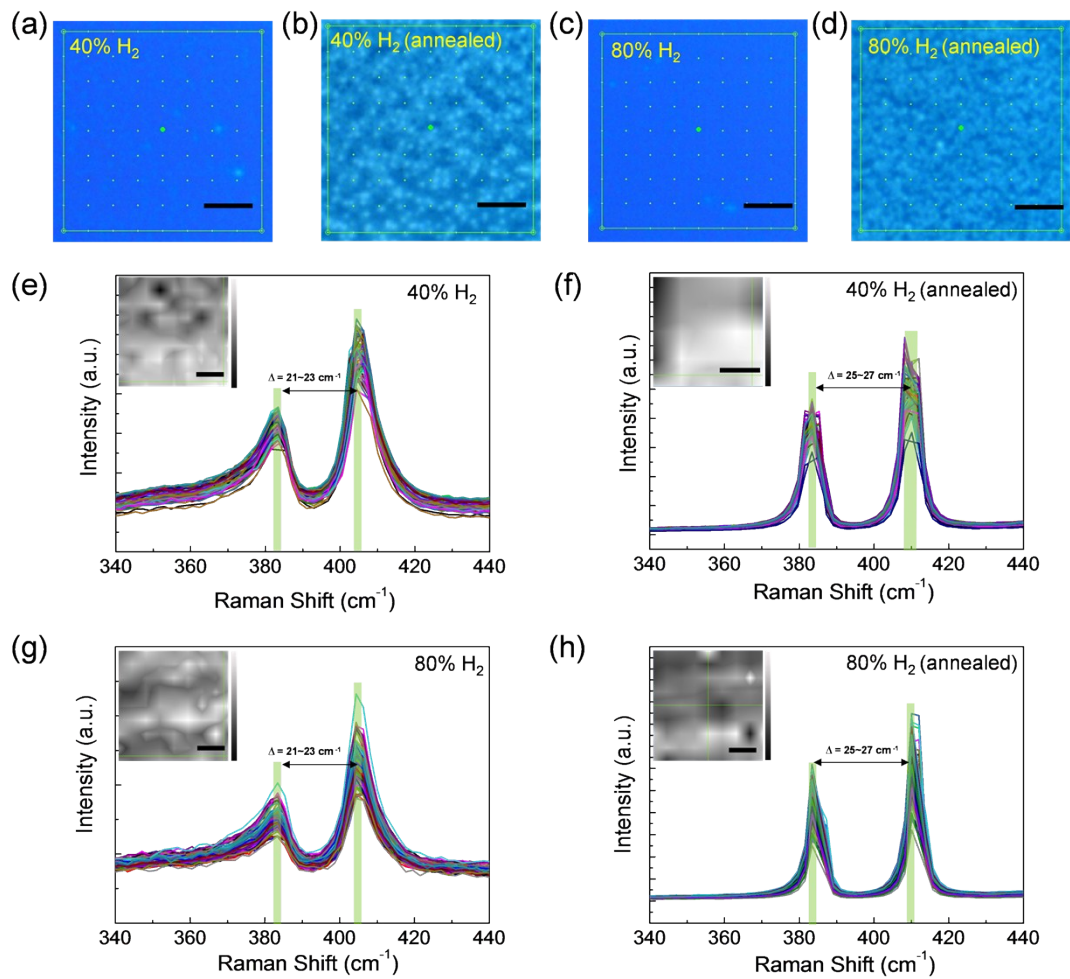

**Figure S5.** Raman mapping of 40% and 80% H<sub>2</sub> samples before and after sulfurization annealing. (a-d) Testing areas (40×40 μm<sup>2</sup>). The step was set as 5 μm for both horizontal and vertical directions. Scale bars: 10 μm. (e,f) Raman mapping data of 40% H<sub>2</sub> sample. (g,h) Raman mapping data of 80% H<sub>2</sub> sample. Insets in (e-h) show corresponding Raman mapping images. Scale bars: 10 μm.

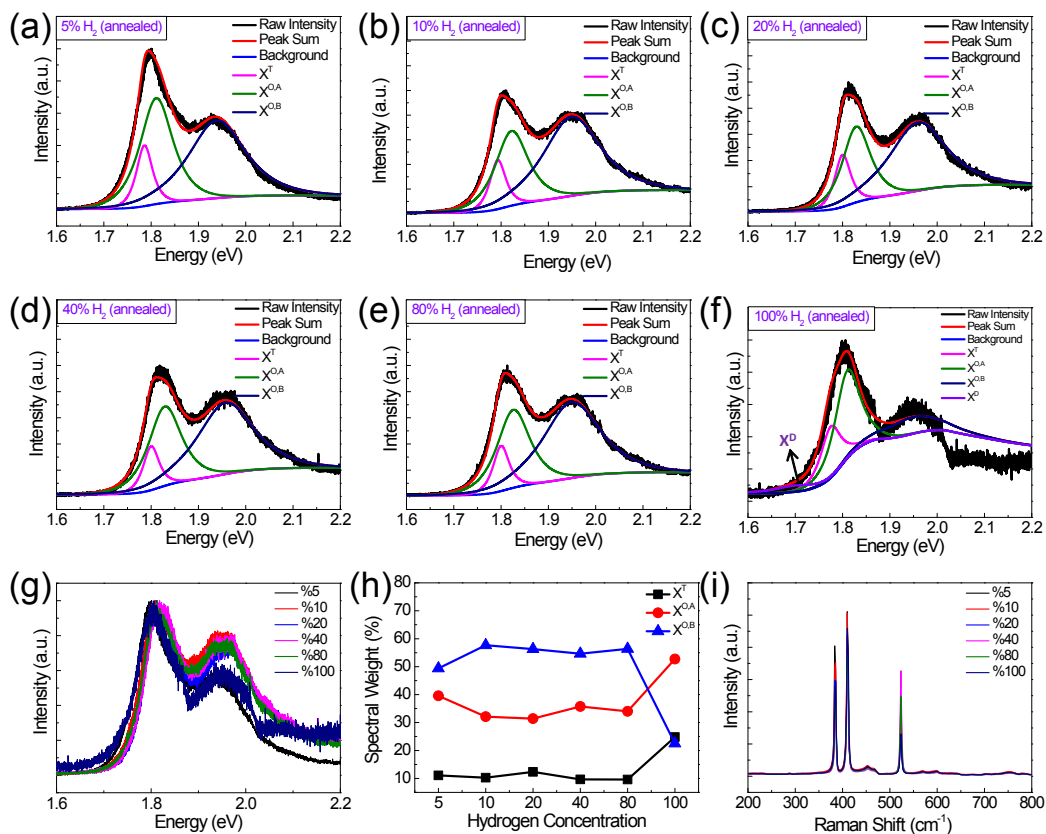

**Figure S6.** PL and Raman characterizations of 5%, 10%, 20%, 40%, 80%, 100% H<sub>2</sub> samples after sulfurization annealing. (a-f) PL curve fittings. (g) Normalized PL spectra for all samples. (h) Spectral weight evolution of charged exciton (X<sup>T</sup>), A-exciton (X<sup>O,A</sup>) and B-exciton (X<sup>O,B</sup>) peaks at different H<sub>2</sub> contents. (i) Raman spectra of all samples.
